# Supplementary material for: From AgGaS2to AgHgPS4: vacancy defects and highly distorted HgS4tetrahedra double-induced remarkable second-harmonic generation response
Source: Royal Society of Chemistry journal article supplement (doi:10.1039/d0tc05093h), 2020-12-12

## **From AgGaS<sub>2</sub> to AgHgPS<sub>4</sub>: vacancy defects and highly distorted HgS<sub>4</sub> tetrahedra double-induced remarkable second-harmonic generation response**

Wenhao Xing,<sup>[abc]</sup> Naizheng Wang,<sup>[ac]</sup> Chunlan Tang,<sup>[b]</sup> Chunxiao Li,<sup>[ac]</sup> Zheshuai Lin,<sup>[a]</sup>  
Jiyong Yao,<sup>\*[a]</sup> Wenlong Yin,<sup>\*[bd]</sup> and Bin Kang<sup>[bd]</sup>

<sup>a</sup> Beijing Center for Crystal Research and Development, Key Lab of Functional Crystals and Laser Technology, Technical Institute of Physics and Chemistry, Chinese Academy of Sciences, Beijing 100190, P. R. China, corresponding author: Jiyong Yao, E-mail: [jyao@mail.ipc.ac.cn](mailto:jyao@mail.ipc.ac.cn).

<sup>b</sup> Institute of Chemical Materials, China Academy of Engineering Physics, Mianyang 621900, People's Republic of China. corresponding author: Wenlong Yin, E-mail: [wlyin@caep.cn](mailto:wlyin@caep.cn).

<sup>c</sup> University of Chinese Academy of Sciences, Beijing 100049, P. R. China.

<sup>d</sup> Key Laboratory of Science and Technology on High Energy Laser, China Academy of Engineering Physics, Mianyang 621900, People's Republic of China.

**Table S1** Atomic coordinates, equivalent isotropic displacement parameters and bond valence sums (BVS) for AgHgPS<sub>4</sub>.

| Atom | <i>x</i>     | <i>y</i>    | <i>z</i>     | $U_{\text{eq}}$ (Å <sup>2</sup> ) <sup>a</sup> | BVS   |
|------|--------------|-------------|--------------|------------------------------------------------|-------|
| Hg   | 0.41570 (4)  | 0.81444 (8) | 0.26543 (4)  | 0.0238 (2)                                     | 2.04  |
| Ag   | 0.90874 (18) | 0.6438 (2)  | 0.52054 (16) | 0.0290 (3)                                     | 1.09  |
| P    | 0.4167(6)    | 0.3155(4)   | 0.5180(4)    | 0.0098 (8)                                     | 4.81  |
| S1   | 0.4992 (5)   | 0.6264 (5)  | 0.5515 (4)   | 0.0139 (6)                                     | -2.02 |
| S2   | 0.5704 (5)   | 0.1937 (5)  | 0.3078 (4)   | 0.0150 (6)                                     | -1.96 |
| S3   | 0.5069 (5)   | 0.1464 (5)  | 0.7370 (4)   | 0.0143 (6)                                     | -1.94 |
| S4   | 0.0904 (5)   | 0.2787 (5)  | 0.4796 (4)   | 0.0134 (6)                                     | -2.01 |

<sup>a</sup>  $U_{\text{eq}}$  is defined as one-third of the trace of the orthogonalized  $U_{ij}$  tensor.

**Table S2** Selected band distances (Å) and band angles (°) for AgHgPS<sub>4</sub>.

|                                         |             |                                         |             |
|-----------------------------------------|-------------|-----------------------------------------|-------------|
| Hg1—S1                                  | 2.536 (3)   | Ag1—S3 <sup>iii</sup>                   | 2.624 (3)   |
| Hg1—S2 <sup>i</sup>                     | 2.613 (3)   | Ag1—S4 <sup>v</sup>                     | 2.601 (4)   |
| Hg1—S3 <sup>ii</sup>                    | 2.559 (3)   | P1—S1                                   | 2.056 (4)   |
| Hg1—S4 <sup>iii</sup>                   | 2.526 (3)   | P1—S2                                   | 2.035 (5)   |
| Ag1—S1                                  | 2.564 (3)   | P1—S3                                   | 2.058 (5)   |
| Ag1—S2 <sup>iv</sup>                    | 2.610 (3)   | P1—S4                                   | 2.058 (5)   |
|                                         |             |                                         |             |
| S1—Hg1—S2 <sup>i</sup>                  | 104.98 (10) | S2 <sup>iv</sup> —Ag1—S3 <sup>iii</sup> | 113.64 (11) |
| S1—Hg1—S3 <sup>ii</sup>                 | 107.87 (10) | S4 <sup>v</sup> —Ag1—S2 <sup>iv</sup>   | 106.99 (11) |
| S3 <sup>ii</sup> —Hg1—S2 <sup>i</sup>   | 106.49 (10) | S4 <sup>v</sup> —Ag1—S3 <sup>iii</sup>  | 104.24 (11) |
| S4 <sup>iii</sup> —Hg1—S1               | 123.35 (10) | S1—P1—S3                                | 109.7 (2)   |
| S4 <sup>iii</sup> —Hg1—S2 <sup>i</sup>  | 99.22 (10)  | S1—P1—S4                                | 111.7 (2)   |
| S4 <sup>iii</sup> —Hg1—S3 <sup>ii</sup> | 113.02 (9)  | S2—P1—S1                                | 110.1 (2)   |
| S1—Ag1—S2 <sup>iv</sup>                 | 107.93 (11) | S2—P1—S3                                | 108.55 (19) |
| S1—Ag1—S3 <sup>iii</sup>                | 110.12 (11) | S2—P1—S4                                | 108.7 (2)   |
| S1—Ag1—S4 <sup>v</sup>                  | 114.01 (11) | S3—P1—S4                                | 108.1 (2)   |

Symmetry codes: (i)  $x, y+1, z$ ; (ii)  $x-1/2, -y+1, z-1/2$ ; (iii)  $x+1/2, -y+1, z-1/2$ ; (iv)  $x+1/2, -y+1, z+1/2$ ; (v)  $x+1, y, z$ ; (vi)  $x, y-1, z$ ; (vii)  $x-1/2, -y+1, z+1/2$ ; (viii)  $x-1, y, z$ .

**Figure S1.** The EDX results of AgHgPS<sub>4</sub>.

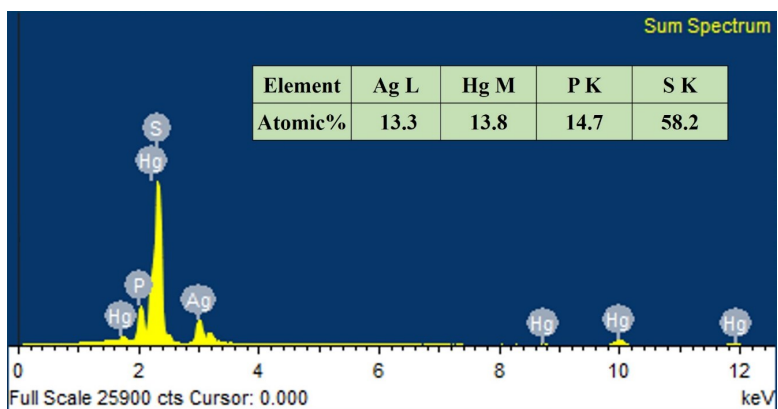

**Figure S2.** DSC curve of AgHgPS<sub>4</sub>.

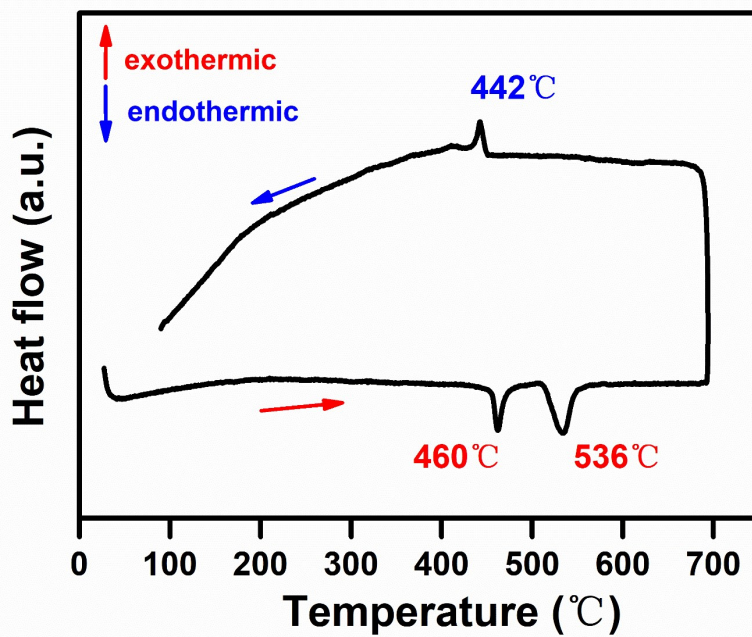

**Figure S3.** The infrared spectrum of AgHgPS<sub>4</sub>.

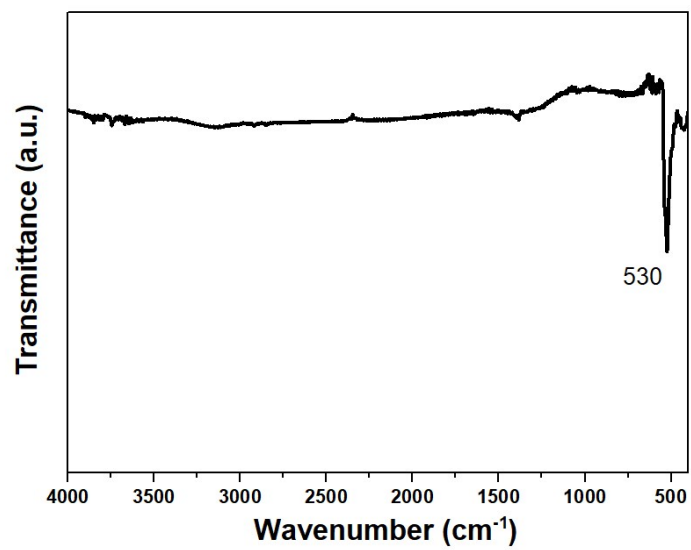

Supplement: d0tc05093h1.pdf [file d0tc05093h1.pdf]
